# Supplementary material for: Brain mitochondrial diversity and network organization predict anxiety-like behavior in male mice
Source: PubMed Central journal article supplement (PMC10415311; doi:10.1038/s41467-023-39941-0), 2023-08-10
Supplement: 41467_2023_39941_MOESM3_ESM.pdf [file 41467_2023_39941_MOESM3_ESM.pdf]

## Description of Additional Supplementary Files

**Supplementary Data 1. In situ hybridization RNA transcript average abundance data per brain region, from the Allen Mouse Brain Atlas accessed via The Harmonizome.** Starting from all microscopic areas with in situ gene expression data (n=2,170), areas that correspond to each of our target brain areas were selected, which are listed on the tab labeled 'Included\_subregions\_list'. These subregions were then averaged to obtain a single expression value for each gene, per brain area, which is listed on the tab labeled 'Regional\_average\_gene\_expression'.

**Supplementary Data 2. Differential gene expression analysis between the three identified networks.** Expression values for each gene per brain area were averaged across brain regions for each of the networks (n=6 areas), network 2 (6 areas), and network 3 (4 areas) to create average gene expression values for each network. Genes that are labeled as upregulated are overexpressed by >100% (double) using a threshold of one Log<sub>2</sub> unit, and genes that are labeled as downregulated are underexpressed by >50% (half) in that network relative to the other two networks.

**Supplementary Data 3. A markdown file containing code and figures shown in Figure 4.** This file also contains additional information (tables, interactive plots) supporting the analysis. This data utilized the Allen mouse brain atlas dataset and human MitoCarta3.0.
